# Supplementary material for: Higher-power supercapacitor electrodes based on mesoporous manganese oxide coating on vertically aligned carbon nanofibers
Source: Royal Society of Chemistry journal article supplement (doi:10.1039/c5nr01198a), 2015-01-01
Supplement: c5nr01198a1.pdf [file c5nr01198a1.pdf]

## Supplementary Information

### **Higher-Power Supercapacitor Electrodes Based on Mesoporous Manganese Oxide Coating on Vertically Aligned Carbon Nanofibers**

*Steven A. Klankowski<sup>a</sup>, Gaiind P. Pandey<sup>a</sup>, Gary Malek<sup>b</sup>, Conor R. Thomas<sup>c</sup>,  
Steven L. Bernasek<sup>c</sup>, Judy Wu<sup>b</sup>, and Jun Li<sup>a,\*</sup>*

<sup>a</sup>Department of Chemistry, Kansas State University, Manhattan, KS 66506, USA

<sup>b</sup>Department of Physics and Astronomy, University of Kansas, Lawrence, KS 66045, USA

<sup>c</sup>Department of Chemistry, Princeton University, Princeton, NJ 08544, USA

\*Corresponding author: [junli@ksu.edu](mailto:junli@ksu.edu)

### 100 nm BEFORE OXIDATION

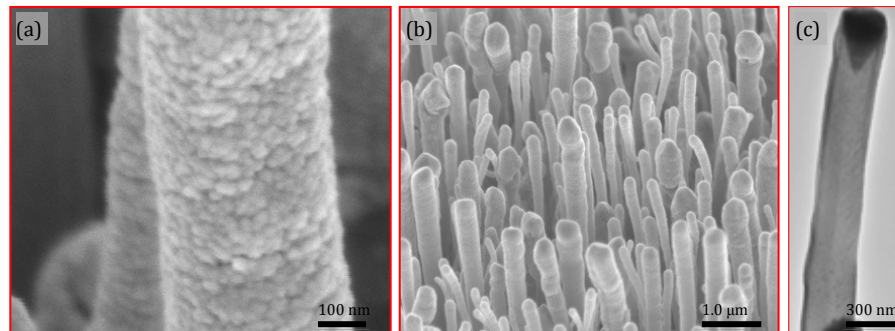

### 300 nm BEFORE OXIDATION

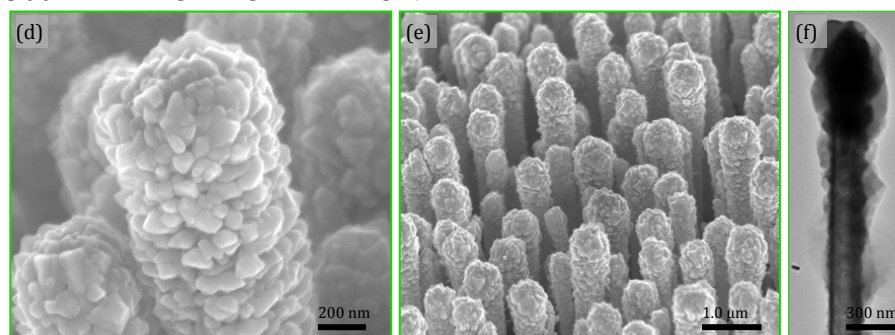

### 600 nm BEFORE OXIDATION

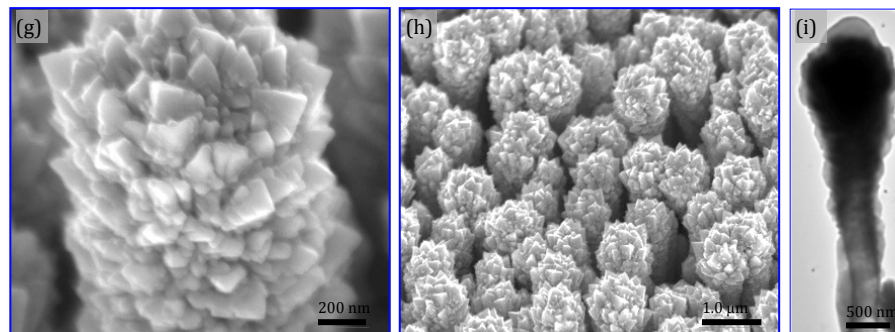

Figure S1. Scanning electron microscopy (SEM) and tunneling electron microscopy (TEM) of the Mn-coated VACNFs just after Mn sputtering to various nominal thicknesses of 100, 300, and 600 nm. Scale bars are 100 nm, 1.0  $\mu\text{m}$ , 300nm; 200 nm, 1.0  $\mu\text{m}$ , 300nm; 200 nm, 1.0  $\mu\text{m}$ , 500nm, respectively.

### 100 nm AFTER OXIDATION

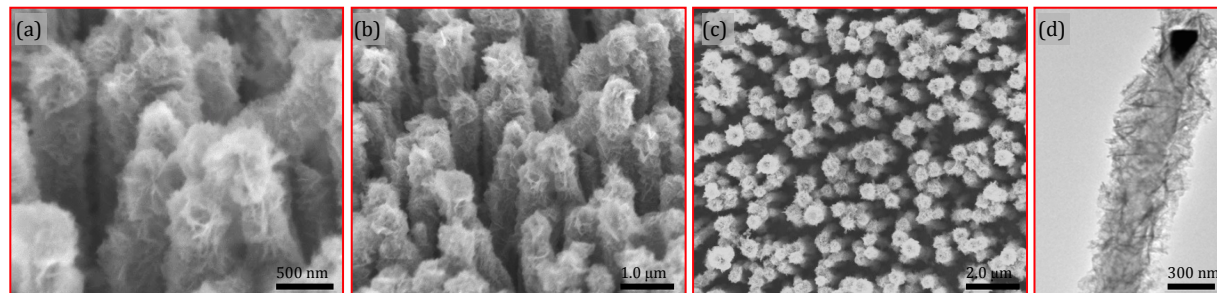

### 300 nm AFTER OXIDATION

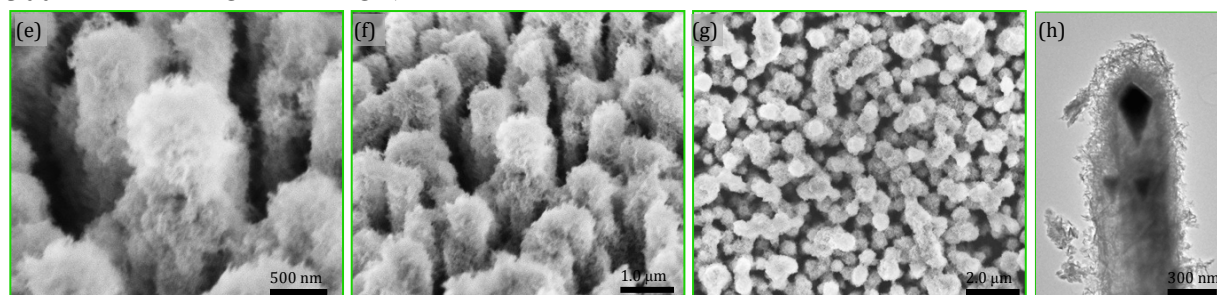

### 600 nm AFTER OXIDATION

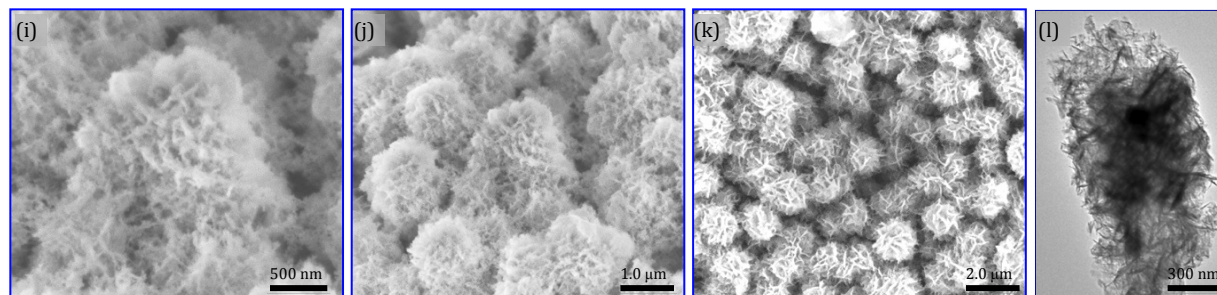

Figure S2. SEM and TEM of the MnO<sub>x</sub>-coated VACNFs after oxidation and cycling characterizations of MnO<sub>x</sub> material. Images are shown in respect to their various nominal thickness of 100, 200, 300, or 600 nm. Scale bars are 500 nm in panels (a), (e) and (i); 1.0 μm in panels (b), (f) and (j); 2.0 μm in panels (c), (g) and (k); and 300nm in panels (d), (h) and (l).

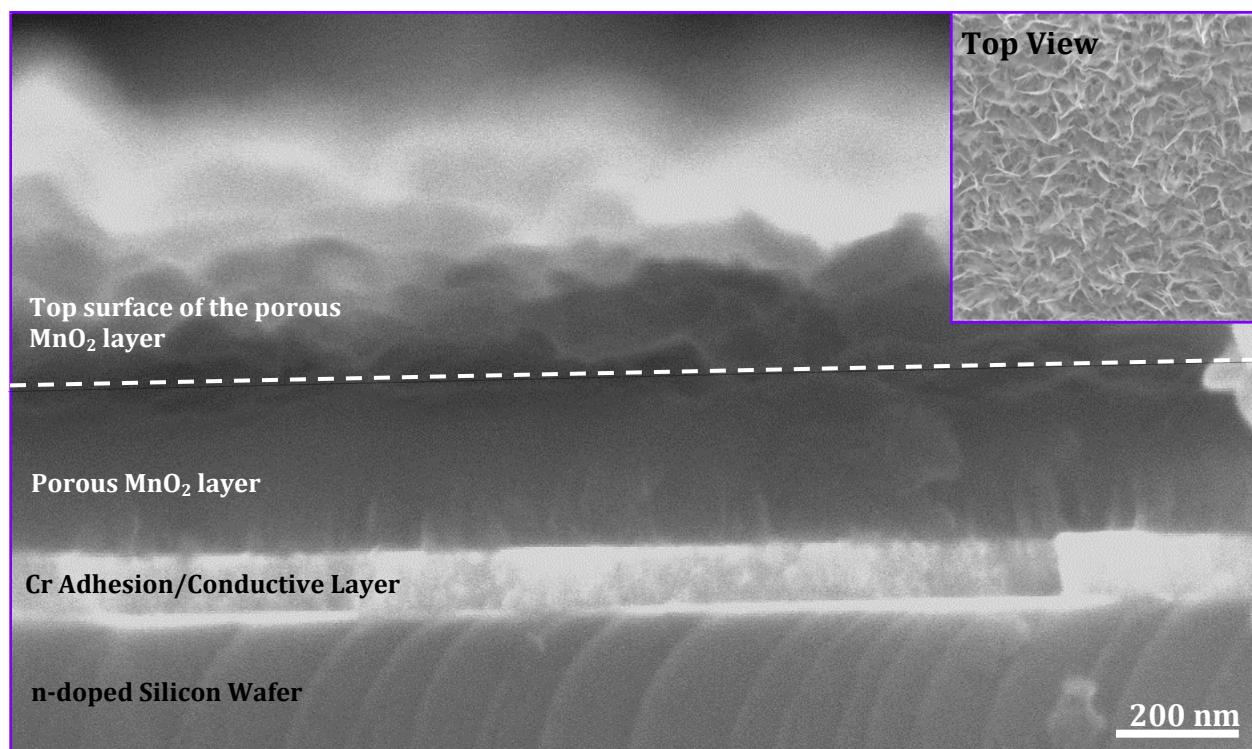

Figure S3 – A cross-sectional SEM image of a 100 nm thick Mn film on Cr-coated Si wafer after electrochemical oxidation in 1.0 M Na<sub>2</sub>SO<sub>4</sub>. The oxidation of Mn into MnO<sub>2</sub> caused the expansion of the film thickness and the formation of the rough, billowy texture. A 100 nm Cr layer was deposited on the n-doped silicon wafer to promote adhesion and provide good conductivity to the Mn or MnO<sub>x</sub> film. The inset is the top-view image (5 μm x 5 μm) of the outer surface of the MnO<sub>x</sub> film showing a rose-petal-like film structure.

#### Estimation of the maximum Mn<sup>2+</sup> dissolution:

During electrochemical oxidation, some manganese may dissolve into solution (1 M NaSO<sub>4</sub>, pH = 9.4) in form of Mn<sup>2+</sup>. The amount varies, but the maximum [Mn<sup>2+</sup>] can be estimated below:

$$\text{Mn(OH)}_2 \rightleftharpoons \text{Mn}^{2+} + 2\text{OH}^- \quad K_{\text{sp}} = 1.9 \times 10^{-13} \quad \text{pH} = 9.4 \quad [\text{OH}^-] = 2.51 \times 10^{-5}$$

$$[\text{Mn}^{2+}] = 1.9 \times 10^{-13} / [\text{OH}^-]^2 = 1.9 \times 10^{-13} / (2.51 \times 10^{-5})^2 = 0.30 \text{ mM}$$

With 6 mL of electrolyte used, only 98.9 μg of Mn<sup>2+</sup> can possibly dissolve. As a result, the maximum percentage of Mn mass loss for various nominal thickness is:

|                     |                     |
|---------------------|---------------------|
| 100 nm Sample = 63% | 200 nm Sample = 31% |
| 300 nm Sample = 21% | 100 nm Sample = 10% |

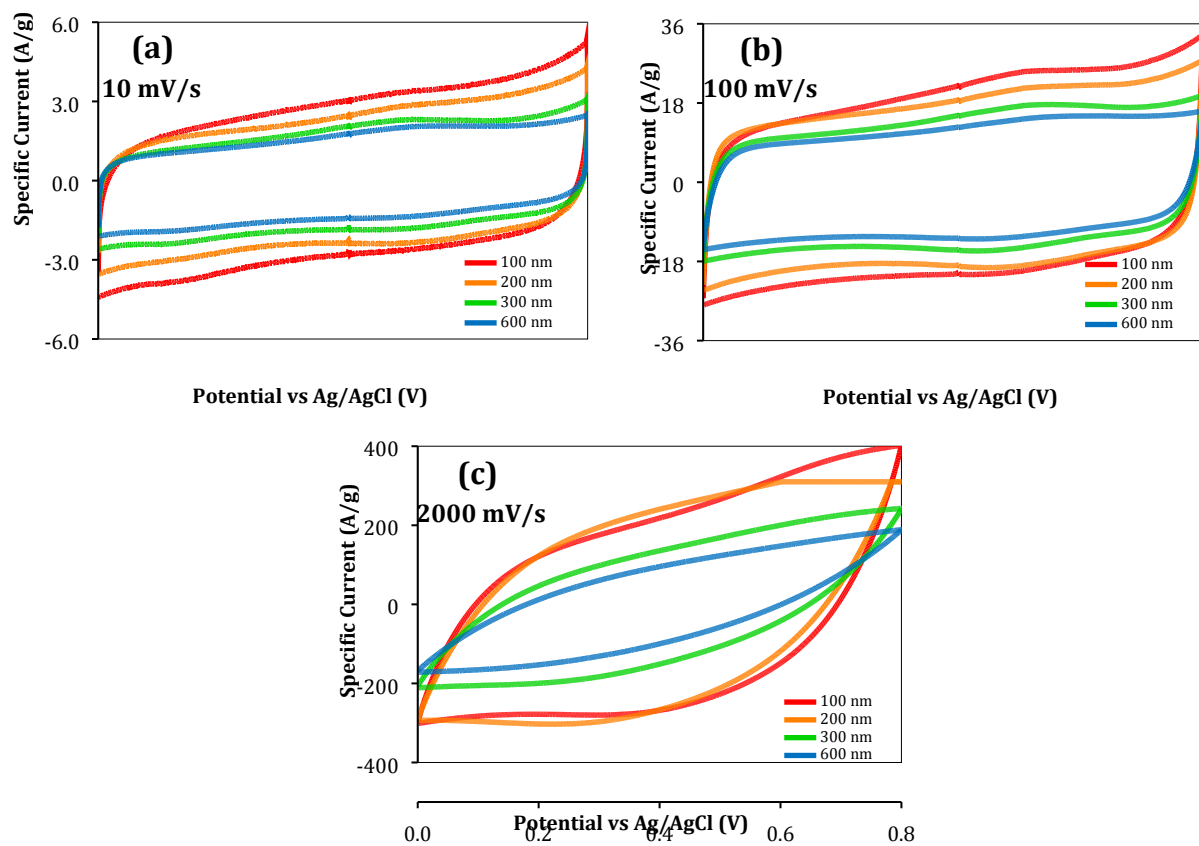

Figure S4. Cyclic voltammetric I-V curves of Mn-coated VACNF electrodes with nominal thickness of 100, 200, 300, and 600 nm, performed at the scan rates of (a) 10 mV s<sup>-1</sup>, (b) 100 mV s<sup>-1</sup>, and (c) 2000 mV s<sup>-1</sup>.



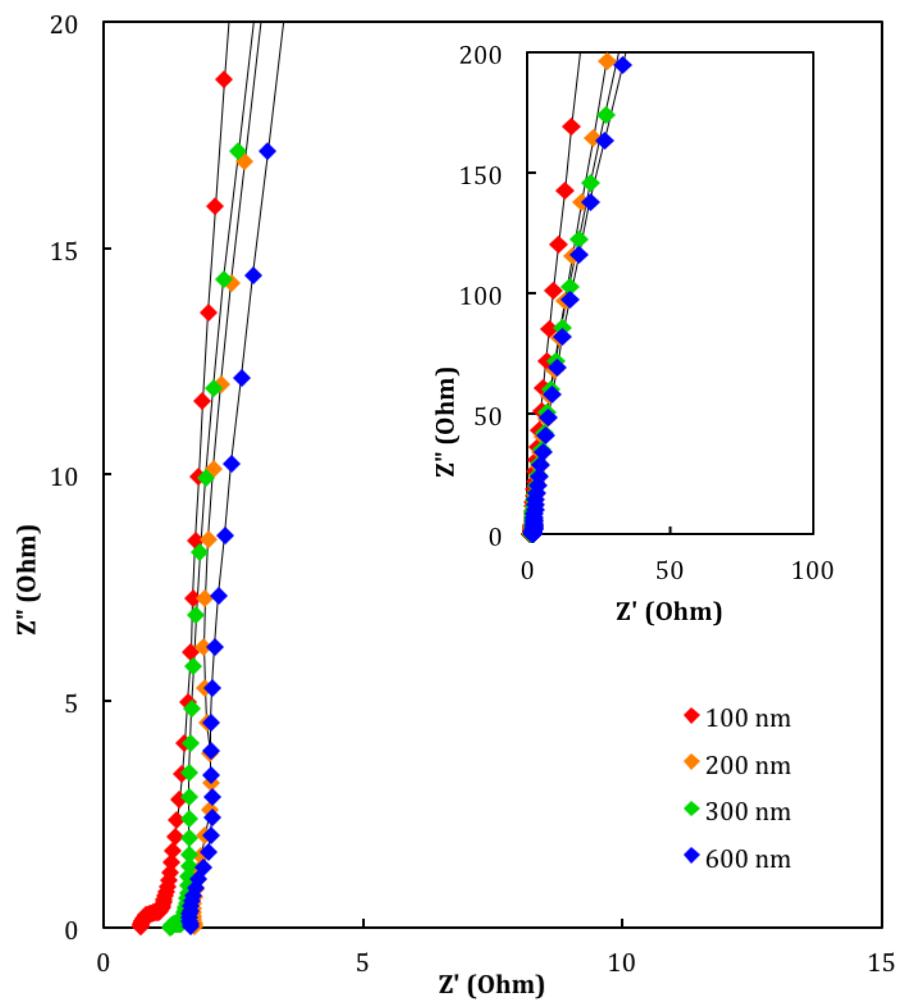

Figure S5. Nyquist plot of electrochemical impedance spectra of the MnO<sub>2</sub>-coated VACNFs. The inset shows the full spectra.

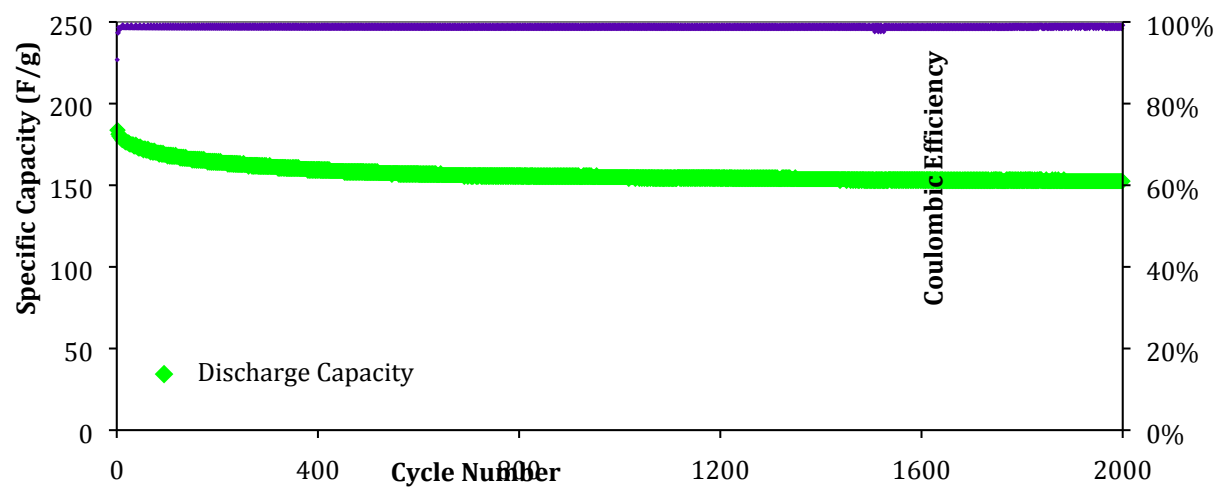

Figure S6 – The cycling performance of an  $\text{MnO}_2/\text{VACNF}$  electrode started with 300 nm nominal Mn thickness during charge-discharge at  $10 \text{ A g}^{-1}$  for 2,000 cycles, showing discharge capacity (green line) and coulombic efficiency (purple line) versus the cycle number.
